# Supplementary material for: Comparison of Protein- or Amino Acid-Based Supplements in the Rehabilitation of Men with Severe Obesity: A Randomized Controlled Pilot Study
Source: MDPI journal article supplement (doi:10.3390/jcm12134257), 2023-06-25
Supplement: s1 [file s1]

**Supplementary Table S1**

Nutritional supplement used in the intervention groups (P, proteins, BCAA, Branched Chain Amino Acids, PD-E07, Branched Chain Amino Acids and tricarboxylic acids). The composition and commercial name are indicated.

|                                                     | <b>P</b><br><i>Protifar®</i> | <b>BCAA</b><br><i>Friliver®</i> | <b>PD-E07</b><br><i>Amino-Ther® PRO</i> |
|-----------------------------------------------------|------------------------------|---------------------------------|-----------------------------------------|
|                                                     | <b>g/100 g</b>               | <b>g/100 g</b>                  | <b>g/100 g</b>                          |
| <b>Macronutrients (g)</b>                           |                              |                                 |                                         |
| Protein                                             | 87.2                         | -                               | -                                       |
| Carbohydrate                                        | 1.2                          | 66.9                            | 36.8                                    |
| <i>Polyalcohol</i>                                  | -                            | 10                              | -                                       |
| Fat                                                 | 1.6                          | -                               | -                                       |
| <i>Saturated</i>                                    | 1.2                          | -                               | -                                       |
| <i>Unsaturated</i>                                  | 0.4                          | -                               | -                                       |
| <b>Minerals (mg)</b>                                |                              |                                 |                                         |
| Na                                                  | 110                          | -                               | -                                       |
| K                                                   | 140                          | -                               | -                                       |
| Ca <sup>++</sup>                                    | 1350                         | -                               | -                                       |
| P                                                   | 700                          | -                               | -                                       |
| Mg                                                  | ≤ 20                         | -                               | -                                       |
| Cl                                                  | 80                           | -                               | -                                       |
| <b>Amino acids, vitamins and TCA precursors (g)</b> |                              |                                 |                                         |
| Leucine                                             | -                            | 12                              | 23.46                                   |
| Isoleucine                                          | -                            | 6                               | 17.59                                   |
| Valine                                              | -                            | 6                               | 13.68                                   |
| Lysine                                              | -                            | -                               | 11.73                                   |
| Threonine                                           | -                            | -                               | 11.73                                   |
| Histidine                                           | -                            | -                               | 2.93                                    |
| Cysteine/cystine                                    | -                            | -                               | 2.93                                    |
| Phenylalanine                                       | -                            | -                               | 1.95                                    |
| Methionine                                          | -                            | -                               | 0.98                                    |
| Tryptophan                                          | -                            | -                               | 0.98                                    |
| Vit B6                                              | -                            | -                               | 0.02                                    |
| Vit B1                                              | -                            | -                               | 0.01                                    |
| Citric acid                                         | -                            | -                               | 8.00                                    |
| Succinic acid                                       | -                            | -                               | 2.00                                    |
| Malic acid                                          | -                            | -                               | 2.00                                    |
| <b>Calories (%)</b>                                 |                              |                                 |                                         |
| Protein or amino acid                               | 95                           | 26                              | 68                                      |
| Carbohydrate                                        | 1                            | 74                              | 32                                      |
| Fat                                                 | 4                            | 0                               | 0                                       |
| <b>Total energy (kcal)</b>                          | 368.0                        | 260.0                           | 402.0                                   |

**Supplementary Table S2** – Anthropometric and clinical parameters measured after randomization in the four study groups (CTR, control group; P, Protein supplementation group; BCAA, Branched Chain Amino Acid supplementation group; and PD-E07, Branched Chain Amino Acid and tri-carboxylic Acids supplementation group) at baseline (before the 4 weeks intervention). Data are expressed as mean ( $\pm$  standard deviation, SD).

|                          | CTR<br>(N=10)  | P<br>(N=10)   | AA<br>(N=10)  | PD-E07<br>(N=10) | P-value† |
|--------------------------|----------------|---------------|---------------|------------------|----------|
| Age (years)              | 55.5(4.22)     | 49.7(3.8)     | 52(4.29)      | 53(6.63)         | 0.0803   |
| Weight (kg)              | 127.48(19.72)  | 137.33(26.49) | 130.65(13.39) | 138.04(25.99)    | 0.6544   |
| BMI (Kg/m <sup>2</sup> ) | 42.09(4.98)    | 45.55(7.15)   | 44.09(3.16)   | 46.06(9.67)      | 0.5543   |
| Waist (cm)               | 131.5(14.83)   | 134.3(12.23)  | 132.5(8.75)   | 134.8(15.4)      | 0.9360   |
| Sys P (mmHg)             | 142.5(12.75)   | 146.67(21.65) | 147(15.67)    | 153(24.52)       | 0.6787   |
| Diast P (mmHg)           | 88.5(7.84)     | 86.11(7.82)   | 89.5(10.12)   | 85.5(9.85)       | 0.7252   |
| Heart Rate (n/min)       | 81.1(12.9)     | 81.44(10.6)   | 81(10.82)     | 79.5(10.54)      | 0.9817   |
| FM (kg)                  | 52.61(12.1)    | 55.29(12.66)  | 55.99(7.21)   | 62.93(21.84)     | 0.4382   |
| FM (%)                   | 41.06(3.1)     | 40.44(2.43)   | 42.91(3.31)   | 44.82(6.86)      | 0.1143   |
| FFM (kg)                 | 74.43(8.31)    | 80.93(14.35)  | 72.45(12.03)  | 74.61(8.67)      | 0.3635   |
| FFM (%)                  | 58.94(3.1)     | 59.56(2.43)   | 56.61(3.71)   | 55.18(6.86)      | 0.1077   |
| MM (Kg)                  | 40.93(4.52)    | 42.32(8.07)   | 42.83(4.57)   | 37.46(5.79)      | 0.1898   |
| MM (%)                   | 32.52(3.82)    | 31.62(5.75)   | 33.16(2.77)   | 27.64(3.89)      | 0.0254   |
| REE (Kcal/die)           | 2126.38(229.4) | 2036.6(262.7) | 2077.4(243.1) | 2206.5(322.9)    | 0.5793   |
| Glucose (mg/dl)          | 96.2(14.18)    | 97.4(9.32)    | 95.6(7.43)    | 101.6(9.64)      | 0.5752   |
| Insulin (mU/L)           | 20.9(7.08)     | 16.56(5.06)   | 18.38(5.94)   | 19.98(6.09)      | 0.4495   |
| HDL (mg/dl)              | 36.7(6.09)     | 37.7(9.07)    | 39.9(5.82)    | 40.3(6.13)       | 0.6015   |
| LDL (mg/dl)              | 116.2(37.14)   | 129.9(31.8)   | 157.6(32.47)  | 125.4(37.16)     | 0.0648   |
| TG (mg/dl)               | 157.3(46.52)   | 154.2(47.23)  | 168.1(51.52)  | 159.6(28.8)      | 0.9091   |
| HbA1c (%)                | 5.88(0.47)     | 5.81(0.44)    | 5.69(0.27)    | 5.77(0.41)       | 0.7622   |
| 6MWT (meters)            | 504.22(72.25)  | 509.67(41.3)  | 466.11(184.3) | 428.22(182.93)   | 0.5619   |
| HGS (right arm, Kg)      | 41.72(4.78)    | 44.02(12.76)  | 45.5(9.49)    | 47.87(8.57)      | 0.5453   |
| HGS (left arm, Kg)       | 40.21(4.95)    | 40.46(11.19)  | 40.73(8.39)   | 46.07(8.81)      | 0.4135   |
| CAF (ug/ml)              | 95.05(98.34)   | 52.7(36.27)   | 26.62(21.65)  | 292.42(541)      | 0.2153   |
| Irisin (ug/ml)           | 8.05(7.18)     | 18.8(15.55)   | 11.83(7.81)   | 8.64(4.25)       | 0.1236   |
| P3NP (ug/ml)             | 17.59(22.11)   | 26.51(26.5)   | 19.62(14.81)  | 25.86(24.28)     | 0.7860   |

Abbreviations: BMI: Body Mass Index; Sys P: Systolic Blood pressure; Diast P: Diastolic Blood Pressure; FM: Fat Mass; FFM: Fat free Mass; MM: Muscular Mass; REE: Resting Energy expenditure; HbA1c: Glycated haemoglobin; HDL: high density lipoproteins; LDL: low density lipoproteins; TG: triglycerides; 6MWT: six minutes walking test; HGS: Handgrip Strength; CAF: C-terminal agrin fragment; P3NP: procollagen type III N-terminal peptide † ANOVA model

**Supplementary Table S3** – Anthropometric and clinical parameters in the 4 study groups (CTR, control group; P, Protein supplementation group; BCAA, Branched Chain Amino Acid supplementation group; and PD-E07, Branched Chain Amino Acid and tri-carboxylic Acids supplementation group) after the 4 weeks intervention. Data are expressed as mean and (standard deviation).

|                          | CTR<br>(N=10)  | P<br>(N=10)    | AA<br>(N=10)  | PD to E07<br>(N=10) | P-value † |
|--------------------------|----------------|----------------|---------------|---------------------|-----------|
| Weight (kg)              | 120.71(17.81)  | 128.99(23.17)  | 124.53(12.68) | 130.74(23.47)       | 0.6697    |
| BMI (Kg/m <sup>2</sup> ) | 39.84(4.36)    | 42.83(6.21)    | 41.99(3.03)   | 43.51(8.7)          | 0.5515    |
| Waist (cm)               | 125.2(12.8)    | 122.5(10.33)   | 128.1(7.82)   | 126.4(13.66)        | 0.7340    |
| Sys P (mmHg)             | 120(11.3)      | 120(11.55)     | 130.56(9.5)   | 128.5(11.07)        | 0.0755    |
| Diast P (mmHg)           | 76.5(9.44)     | 79.5(5.99)     | 80.56(8.08)   | 81(9.66)            | 0.6378    |
| Heart Rate (n/min)       | 76.6(10.96)    | 76.7(8.84)     | 78.44(8.37)   | 71.7(14.17)         | 0.5642    |
| FM (kg)                  | 49.99(10.29)   | 53.42(15.95)   | 50.39(5.93)   | 56.99(19.86)        | 0.6623    |
| FM (%)                   | 40.92(3.35)    | 40.44(5.65)    | 40.39(3.64)   | 42.52(7.11)         | 0.7735    |
| FFM (kg)                 | 71.4(8.59)     | 76.8(10.75)    | 74.66(9.73)   | 74.65(10.4)         | 0.6806    |
| FFM (%)                  | 59.06(3.31)    | 59.59(5.66)    | 59.61(3.64)   | 57.48(7.11)         | 0.7702    |
| MM (Kg)                  | 38.47(3.87)    | 39.57(4.69)    | 41.83(5.13)   | 40.3(5.09)          | 0.4553    |
| MM (%)                   | 32.05(3.98)    | 31.18(5.97)    | 33.5(3.11)    | 31.27(4.94)         | 0.6589    |
| REE (Kcal/die)           | 2009.63(238.5) | 2045.86(280.5) | 1953.7(261.4) | 2111.86(291.8)      | 0.6808    |
| Glucose (mg/dl)          | 86.7(3.97)     | 93(12.43)      | 92.9(8.1)     | 91.5(4.48)          | 0.2667    |
| Insulin (mU/L)           | 17.94(7.37)    | 17.73(8.19)    | 15.15(6.37)   | 19.09(6.74)         | 0.6912    |
| HDL (mg/dl)              | 34.5(5.52)     | 33.8(8.08)     | 35.7(3.68)    | 37.2(6.76)          | 0.6367    |
| LDL (mg/dl)              | 114.8(18.75)   | 111.7(33.49)   | 121.5(34.96)  | 105.6(33.95)        | 0.7154    |
| TG (mg/dl)               | 130.3(44.35)   | 141.2(30.73)   | 133.6(50.93)  | 132.2(26.67)        | 0.9310    |
| HbA1c (%)                | 5.55(0.45)     | 5.47(0.77)     | 5.55(0.29)    | 5.56(0.35)          | 0.9753    |
| 6MWT (meters)            | 558.4(67.96)   | 513.1(46.75)   | 563.89(45.98) | 487.56(131.3)       | 0.1380    |
| HGS (right arm, Kg)      | 42.78(4.93)    | 47.65(10.68)   | 46.02(10.12)  | 49.49(12.87)        | 0.5122    |
| HGS (left arm, Kg)       | 40.96(4.15)    | 43.85(11.37)   | 42.52(8.94)   | 46.66(11.84)        | 0.6141    |
| CAF (ug/ml)              | 98.35(102.48)  | 47.18(32.58)   | 36.73(29.71)  | 351.34(698.49)      | 0.2256    |
| Irisin (ug/ml)           | 7.18(5.08)     | 27.59(28.75)   | 15.75(18.07)  | 9.27(6.52)          | 0.1094    |
| P3NP (ug/ml)             | 22.12(21.49)   | 24.98(23.3)    | 15.54(13.33)  | 25.2(22.52)         | 0.7041    |

Abbreviations: BMI: Body Mass Index; Sys P: Systolic Blood pressure; Diast P: Diastolic Blood Pressure; FM: Fat Mass; FFM: Fat free Mass; MM: Muscular Mass; REE: Resting Energy expenditure; HbA1c: Glycated haemoglobin; HDL: high density lipoproteins; LDL: low density lipoproteins; TG: triglycerides; 6MWT: six minutes walking test; HGS: Handgrip Strength; CAF: C-terminal agrin fragment; P3NP: procollagen type III N-terminal peptide.

† ANOVA model
